1 **Impact of Antibody Cocktail Therapy Combined with Casirivimab and**  
2 **Imdevimab on Clinical Outcome for Covid-19 patients in A Real-Life Setting: A**  
3 **Single Institute Analysis**

4

5 Yasutaka Kakinoki, Kazuki Yamada, Yoko Tanino, Keiko Suzuki, Takaya Ichikawa, Ai  
6 Nakamura, Shin Kukita, Akito Uehara, Seisuke Saito, Shohei Kuroda, Hidemitsu  
7 Sakagami, Yuuki Nagashima, Kae Takahashi, and Satoshi Suzuki

8

9 Division of Internal Medicine, Asahikawa City Hospital, Asahikawa, Japan

10

11 **Corresponding author:**

12 Yasutaka Kakinoki, MD, PhD.

13 Asahikawa City Hospital, 1-1-65, Kinseicho, Asahikawa, 070-8610, Japan

14 e-mail: [y\\_kakinoki@ach.hokkaido.jp](mailto:y_kakinoki@ach.hokkaido.jp)

15

16 **Shared co-first authorship:** Dr. Yasutaka Kakinoki and Dr. Kazuki Yamada  
17 contributed equally to this article.

18

19 **Keywords:** Covid-19, SARS-CoV-2, cocktail, ronapreve, REGEN-COV

20

21

22

23

24

25

**NOTE:** This preprint reports new research that has not been certified by peer review and should not be used to guide clinical practice.

26 **ABSTRACT**

27 **Background.** Recent data from clinical trial suggest that antibody cocktail therapy, a  
28 combination of the monoclonal antibodies casirivimab and imdevimab, has been shown  
29 to rapidly reduce the viral load and markedly decrease the risk of hospitalization or  
30 death among high-risk patients with coronavirus disease 2019 (Covid-19). However, it  
31 remains unclear how effective in a real-life clinical setting the therapy is.

32 **Methods.** We retrospectively analyzed mild to moderate Covid-19 patients with one or  
33 more high-risk factors for severe disease who consecutively underwent the antibody  
34 cocktail therapy of the disease in our institute in June 2021 through early September  
35 2021, compared to those with high-risk factors who were isolated in non-medical  
36 facilities consecutively during the same period, thereby being not given the antibody  
37 cocktail therapy there. The key outcome was the percentage of patients with Covid-19-  
38 related deterioration which needed additional medical interventions, such as oxygen  
39 support or other antiviral therapies.

40 **Results.** Data from 55 patients with initially receiving antibody cocktail therapy and 53  
41 patients with isolation into non-medical facilities are analyzed. 22 (41.5 %) of 53 patients  
42 with isolation facilities were finally hospitalized to receive medical interventions. On the  
43 other hand, 13 (23.6 %) of 55 patients with antibody cocktail therapy in our hospital  
44 subsequently underwent further medical interventions because of the progression. In  
45 multivariate analysis with variables of age, BMI, and high-risk factors, the antibody  
46 cocktail therapy significantly reduced 70 % in the need for further medical interventions  
47 compared to the initial isolation in the non-medical facilities (odds ratio=0.30, 95%CI  
48 [0.10-0.87], p=0.027). Furthermore, patients with 96% or above of SPO2 were  
49 significantly more favorable for the therapy than those with 95% or below of SPO2.

50 **Conclusion.** The treatment of antibody cocktail was closely linked to reduction in the

51 need for further medical interventions. The result indicates that the antibody cocktail  
52 therapy is associated with reducing the strain on hospitals, which is related to the  
53 improvement of medical management for public health care in Covid-19 pandemic era.

54

## 55 **INTRODUCTION**

56 Coronavirus disease 2019 (Covid-19), caused by severe acute respiratory syndrome  
57 coronavirus 2 (SARS-CoV-2), was first detected in December 2019 and was declared a  
58 global pandemic in March 2020 [1-3]. In Japan, as of September 22, approximately 1.68  
59 million people have been infected and 17 thousand are dead, and about 55% people of  
60 the population are fully vaccinated [4]. Although those records regarding infected figures  
61 appear to be less than in Western countries, the several issues in hospitals are  
62 challenging because of less enough hospital beds availability and shortages of hospital  
63 staffs, mostly nurses. To resolve these issues, Japan's Ministry of Health, Labour and  
64 Welfare (MHLW) has approved the antibody cocktail of casirivimab and imdevimab,  
65 brand name of Ronapreve™ (provided from Roche globally, and from CHUGAI  
66 Pharmaceutical in Japan), for the treatment of mild to moderate Covid-19 patients with  
67 high-risk factors via intravenous infusion, which was granted a Special Approval  
68 Pathway under article 14-3 of the Pharmaceuticals and Medical Devices Act on July 19  
69 in 2021 [5]. The approval of the MHLW has based on results from the global phase 3  
70 REGN-COV2067 trial [6] in high-risk non-hospitalized Covid-19 patients, which showed  
71 that the cocktail therapy reduced hospitalization or any-caused death by 70% and Covid-  
72 19-related symptom duration by 4 days as well as a phase 1 clinical study with safety,  
73 tolerability and pharmacokinetics in Japanese people [7]. In addition, the ability of the  
74 cocktail to retain activity against emerging variants including delta variant has been  
75 demonstrated in vitro study [8-10]. However, these results have been coming up from

76 randomized clinical trials and experimental studies, and therefore what is happening in  
77 a daily clinical practice on the cocktail therapy remains to be seen. Here, we describe  
78 clinical benefits of Ronapreve coming from a real-life clinical practice in our institute.

79

## 80 **METHODS**

### 81 **PATIENTS**

82 Eligible patients were 20 years of age or older, with a confirmed SARS-CoV-2 infection  
83 by real-time reverse transcription PCR (RT-PCR) test, a Covid-19-related fever ( $\geq$   
84  $37.5^{\circ}\text{C}$ ) in mild to moderate condition, and presence of risk factors meeting the criteria  
85 for severe Covid-19 [6] during June 2021 through early September 2021. Local public  
86 health centers made allocation decisions based on factors such as severity and urgency  
87 to deliver patients to hospitals or non-medical facilities for isolation. The use of patient's  
88 clinical information was approved by the Research Ethics Committee of Asahikawa City  
89 Hospital which oversaw the study conduct and documentation, and the data available  
90 from non-medical facilities were authorized to be provided with fully anonymous  
91 condition by the chief officer of the local public health center. This study was conducted  
92 in accordance with the principles of the Declaration of Helsinki.

### 93 **MEDICAL INTERVENTION**

94 Patients assigned to our institute were firstly reviewed to be applicable for the use of  
95 ronapreve according to the criteria [6]. Ronapreve was given at equal doses of 600mg of  
96 casirivimab and imdevimab combined in a 100ml normal saline solution through  
97 intravenous infusion over 30 minutes, if applicable (ronapreve group). Afterward, if  
98 necessary, patients can receive additional further therapy such as oxygen support,  
99 steroids, or antiviral drugs. Patients assigned to non-medical facilities were under watch  
100 and wait situation to see if they progress to the point they need hospitalization (watchful

101 observation group). When patients possibly progress or got progressed, they were  
102 immediately transferred to hospitals to receive some treatments for Covid-19.

### 103 **KEY and OTHER OUTCOMES**

104 Key outcomes were designated to the difference between ronapreve and watchful  
105 observation groups in terms of the necessity of additional further treatment such as  
106 oxygen support or antiviral drugs. In ronapreve group, the addition of further treatment  
107 after ronapreve administration indicated the failure of the cocktail therapy as a  
108 definition. In watchful observation group, the transfer of patients to hospitals to receive  
109 some therapies indicated that patients were under intractable or deteriorating  
110 conditions. Other outcomes were designated in ronapreve group to investigate the  
111 duration of fever and adverse events after ronapreve administration.

### 112 **STATISTICAL ANALYSIS**

113 Logistic regression models for multivariate analysis were applied to evaluate the  
114 proposed significant factors in terms of the efficacy of ronapreve, using age, BMI, high-  
115 risk factors, and Percutaneous oxygen saturation (SPO2) as explanatory variables.  
116 Receiver Operating Characteristic (ROC) curves were used to determine the cut-off value  
117 for SPO2. All p-values were two sided and P-values of 0.05 or less were considered  
118 statistically significant. All statistical analyses were performed with EZR version 1.50  
119 (Saitama Medical Center, Jichi Medical University, Saitama, Japan), which is a  
120 graphical user interface for R (The R Foundation for Statistical Computing, Vienna,  
121 Austria). More precisely, it is a modified version of R commander designed to add  
122 statistical functions frequently used in biostatistics [11].

123

### 124 **RESULTS**

#### 125 **PATIENT'S CHARACTERISTICS**

126 Patients were collected consecutively during the period from June 2021 through early  
127 September 2021, when the delta variants were widely spreading in our community. As  
128 a result, 55 patients were given Ronapreve first in our institute (ronapreve group) and  
129 53 patients were initially assigned to non-medical isolation facilities to see the situations  
130 watchfully (watchful observation group) (Table 1).

131 In ronapreve group, the median age was 51 years, 69.1% were male, and median BMI  
132 score was 27.5. In proportion of the number patients have in high-risk factors, 30.9%  
133 possessed 1 factor, 32.7% 2 factors, and 36.4% 3 or more factors. SPO2 tests revealed  
134 67.3% of patients to be 96% or above and 43.6% of patients have pneumonia detected by  
135 CT scan, X-ray imaging, or stethoscopic findings. In contrast, in watchful observation  
136 group, although distributions of age and gender were similar, proportion of high-risk  
137 factors and BMI scores regarding disease progression were significantly lower ( $p < 0.001$   
138 and  $p = 0.01$ , respectively), compared to ronapreve group. Details of the high-risk factors  
139 patients have in both groups together are provided in the Supporting Information (Table  
140 S1).

## 141 **CLINICAL EFFICACY**

### 142 **Key outcomes**

143 In ronapreve group, 23.6% (13/55) of patients eventually needed further medical  
144 interventions after ronapreve administration, such as oxygen support or antiviral drugs  
145 (Figure 1). However, no deterioration was found beyond 5 days after ronapreve  
146 administration, meaning the remaining 76.4% (42/55) of patients in this group fully  
147 recovered from Covid-19 (Figure 1A). On the other hand, Patients in watchful  
148 observation group showed that those who got progressive were increasingly transferred  
149 to hospitals until 12 days after the disease onset, finally mounting up to 41.5% (22/53) of  
150 patients (Figure 1B). In multivariate analysis with age, BMI, and high-risk factors as

151 explanatory variables, ronapreve significantly reduced the need for additional  
152 treatments by 70% compared to watchful observation group patients (odds ratio=0.301,  
153 95%CI [0.104-0.869], p=0.026) (Figure 2). Furthermore, in ronapreve group, patients  
154 with 96% or above of SPO<sub>2</sub>, the cutoff value was established by ROC curves, showed 97%  
155 reduction significantly on the additional treatment compared to patients with 95% or  
156 below of SPO<sub>2</sub> (odds ratio=0.03, 95%CI [0.01-0.22], p<0.001) (Figure 3).

### 157 **Other outcomes**

158 Ronapreve was started at a median time of 3 days from the onset (range; 0 – 7 days)  
159 (Figure S1). Ronapreve treatment was associated with quick relief from Covid-19-  
160 related fever. Out of 27 in-patients, 14 patients (51.9%) were reduced from fever until  
161 the next day, and all 27 patients has achieved afebrile state until 4 days from the  
162 administration, though this result came from limited numbers of 27 in-patients because  
163 of missing data from other 28 out-patients (Figure 4). In regard to vaccinated patients  
164 enrolled, in 3 with one shot and in 5 with 2 shots, one and 4 patients showed to be related  
165 to the fever-down, respectively (Table S2). In aspect of adverse events, one patient  
166 showed infusion reaction of mild swelling of eyelids and urticaria of upper arms during  
167 the drip of ronapreve, resulting in stopping on the way, and 2 patients showed skin  
168 eruption around 2-3 hours after the administration (Table S3).

169

### 170 **DISCUSSION**

171 Ronapreve (also known as REGEN-COV in clinical trials) is a cocktail made up of two  
172 noncompeting neutralizing human IgG1 monoclonal antibodies, casirivimab and  
173 imdevimab, that target the receptor-binding domain of the SARS-CoV-2 spike protein,  
174 thereby preventing viral entry into human cells through the angiotensin-converting  
175 enzyme 2 (ACE2) receptor [8,12]. This cocktail therapy retains neutralization potency

176 against circulating SARS-CoV-2 variants of concern, including B.1.1.7 (or alpha), B.1.351  
177 (or beta), B.1.617.2 (or delta) and so forth in vitro and in vivo [8-10].

178 In a real-life practice setting, we described that the administration of ronapreve  
179 predicted 70% reduction in turning into additional treatment, as compared with watchful  
180 observation in isolation facilities where patients are under watch and wait situation to  
181 see if they progress to the point they need hospitalization to receive treatments (Figure  
182 2). Moreover, we showed 97% reduction of additional treatments in those patients who  
183 were given under conditions of 96% or above of SPO<sub>2</sub>, compared to those with 95% or  
184 below (Figure 3). This result may be associated with suppression of SARS-CoV-2 itself  
185 by ronapreve before a surge of inflammation in lungs. In addition, ronapreve was related  
186 to substantially speed up recovery from Covid-19-related fever at a median time of just  
187 1 day from the administration (Figure 4), which probably represents an additional  
188 benefit for Covid-19 patients. It is worth noting that patients in ronapreve group were  
189 under the worse conditions than those in watchful observation group in terms of risk  
190 factors for the disease progression.

191 Our data in a real-life setting suggest that ronapreve has the potential to prevent mild  
192 to moderate Covid-19 patients with high-risk factors from receiving additional  
193 treatments, such as supplemental oxygen, dexamethasone, or antiviral therapies  
194 because of disease progression, which should be exclusively manipulated in hospital in  
195 Japan. This result indicates that ronapreve is associated with reducing the burden of the  
196 need to take care of Covid-19 patients in hospital beds, which is related to retaining  
197 public health care resources to be normal.

198 Overall, our findings described above are well consistent with data from previous clinical  
199 trials regarding ronapreve. The phase 1/2 trial data showed that REGEN-COV for Covid-  
200 19 patients lowered viral load, reduced the need for medical attention, and was highly



201 suggestive of a reduced risk for hospitalization [13]. The phase 3 clinical trial confirmed  
202 that early treatment with REGEN-COV in outpatients with high-risk factors for severe  
203 Covid-19 dramatically reduced the risk of hospitalization or all-cause death by 70.4%  
204 and the symptom duration by 4 days at equal doses of 600mg of casirivimab and  
205 imdevimab [6]. In addition, the phase 3 trial for the prevention of Covid-19 in household  
206 contacts of infected individuals showed that subcutaneous administration of REGEN-  
207 COV reduced the risk of symptomatic Covid-19 infections by 81.4% [14]. These findings  
208 suggest that REGEN-COV therapy in outpatients with Covid-19 has the potential to  
209 improve patient outcomes and substantially reduce the health care burden by lowering  
210 morbidity and mortality.

211 The important point for ronapreve treatment we mentioned above is that the efficacy for  
212 patients is diminished under the condition of 95% or below of SPO2. Since low SPO2 or  
213 pneumonia is probably associated with cytokine-storm-induced hyper-inflammation  
214 caused by SARS-CoV-2, steroid such as dexamethasone will be more effective to suppress  
215 the storm rather than ronapreve, because the antibody treatment probably affects the  
216 virus itself.

217 In conclusion, ronapreve, also known as REGEN-COV, is thought to be closely linked to  
218 reduction in the risk of hospitalization or the need for additional treatment, along with  
219 a potential benefit of prompt recovery from Covid-19-related fever. Although our data  
220 provided from a daily practice is small-sized and limited, the antibody cocktail therapy  
221 in early phase of the disease suggests a promising way to minimize the serious impact  
222 of Covid-19 on the public health care system.

223

224 **FINANCIAL DISCLOSURE:** I have no financial support or conflicts of interest.

225

226 **ACKNOWLEDGEMENT:** The authors thank all the participating physicians and co-  
227 medical staffs for their care of patients with Covid-19.

228

229 **SUPPORTING INFORMATION:** Additional supporting information may be found  
230 online in the Supporting Information section at the end of the article.

231

232

233

234

235

236

237

238

239

240

241

242

243

244

245

246

247

248

249

250 **REFERENCES**

- 251 1. Zhu N, Zhang D, Wang W, et al. A novel coronavirus from patients with pneumonia  
252 in China, 2019. *N Engl J Med* 2020; 382: 727-733.
- 253 2. World Health Organization. WHO Director-General's opening remarks at the media  
254 briefing on COVID-19 – 11 March 2020. 2020 ([https://www.who.int/director-](https://www.who.int/director-general/speeches/detail/who-director-general-s-opening-remarks-at-the-mrdia-briefing-on-covid-19---11-march-2020)  
255 [general/speeches/detail/who-director-general-s-opening-remarks-at-the-mrdia-](https://www.who.int/director-general/speeches/detail/who-director-general-s-opening-remarks-at-the-mrdia-briefing-on-covid-19---11-march-2020)  
256 [briefing-on-covid-19---11-march-2020](https://www.who.int/director-general/speeches/detail/who-director-general-s-opening-remarks-at-the-mrdia-briefing-on-covid-19---11-march-2020)).
- 257 3. Wu F, Zhao S, Yu B, et al. A new coronavirus associated with human respiratory  
258 disease in China. *Nature* 2020; 579: 265-269.
- 259 4. Ministry of Health, Labour and Welfare. Current status of the novel coronavirus  
260 infection and the response of the MHLW. 2020. Available at:  
261 [https://www.mhlw.go.jp/stf/newpage\\_12312.html](https://www.mhlw.go.jp/stf/newpage_12312.html). Accessed 22 September 2021.
- 262 5. Ministry of Health, Labour and Welfare. Approval for Ronapreve™ (casirivimab and  
263 imdevimab) for the treatment of patients with mild to moderate Covid-19.  
264 Available at: [https://www.mhlw.go.jp/stf/newpage\\_19940.html](https://www.mhlw.go.jp/stf/newpage_19940.html). Accessed 20 July  
265 2021.
- 266 6. Weinreich DM, Sivapalasingam S, Norton T, et al. REGEN-COV antibody cocktail  
267 clinical outcomes study in Covid-19 outpatients. June 6, 2021  
268 (<https://www.medrxiv.org/content/10.1101/2021.05.19.21257469v2>). preprint.
- 269 7. Regeneron's COVID-19 outpatient trial prospectively demonstrates that REGN-  
270 COV2 antibody cocktail significantly reduced virus levels and need for further  
271 medical attention. Regeneron, October 28, 2020  
272 ([https://investor.regeneron.com/news-releases/news-release-details/regenerons-](https://investor.regeneron.com/news-releases/news-release-details/regenerons-covid-19-outpatient-trial-prospectively-demonstrates)  
273 [covid-19-outpatient-trial-prospectively-demonstrates](https://investor.regeneron.com/news-releases/news-release-details/regenerons-covid-19-outpatient-trial-prospectively-demonstrates)).
- 274 8. Baum A, Fulton BO, Wloga E, et al. Antibody cocktail to SARS-CoV-2 spike protein

- 275 prevents rapid mutational escape seen with individual antibodies. *Science* 2020; 369:  
276 1014-1018.
- 277 9. Copin R, Baum A, Wloga E, et al. The monoclonal antibody combination REGEN-  
278 COV protects against SARS-CoV-2 mutational escape in preclinical and human  
279 studies. *Cell* 2021 June 5 (Epub ahead of print).
- 280 10. Wang P, Nair MS, Liu L, et al. Antibody resistance of SARS-CoV-2 variants B.1.351  
281 and B.1.1.7. *Nature* 2021; 593: 130-135.
- 282 11. Kanda Y. Investigation of the freely-available easy-to-use software "EZ R" (Easy R)  
283 for medical statistics. *Bone Marrow Transplant*. 2013; 48, 452-458. advance online  
284 publication 3 December 2012; doi: 10.1038/bmt.2012.244.
- 285 12. Hansen J, Baum A, Pascal KE, et al. Studies in humanized mice and convalescent  
286 humans yield a SARS-CoV-2 antibody cocktail. *Science* 2020; 369: 1010-1014.
- 287 13. Weinreich DM, Sivapalasingam S, Norton T, et al. REGN-COV2, a neutralizing  
288 antibody cocktail, in outpatients with Covid-19. *N Engl J Med* 2021; 384: 238-251.
- 289 14. O'Brien MP, Forleo-Neto E, Musser BJ, et al. Subcutaneous REGEN-COV antibody  
290 combination to prevent Covid-19. *N Engl J Med* 2021 August 4 (Epub ahead of print).  
291  
292  
293  
294  
295  
296  
297  
298  
299

300 **Legends for Tables and Figures**

301

302 **Table 1.**

303 Patients' Demographic and Epidemiological Characteristics.

304 Abbreviations: IQR, interquartile range; BMI, body mass index; SPO<sub>2</sub>, Percutaneous  
305 oxygen saturation.

306 #High-risk factors for severe Covid-19 include an age of more than 50 years, obesity (BMI  
307  $\geq 30$ ), cardiovascular disease (including hypertension), chronic lung disease (including  
308 asthma), chronic metabolic disease (including diabetes), chronic kidney disease  
309 (including receipt of dialysis), chronic liver disease, and immunocompromise.

310

311 **Figure 1.**

312 Time to additional treatment.

313 Event indicates that additional treatments are started.

314 A) shows time (day) to the next additional treatment after ronapreve administration  
315 (date of the dripping indicates day 0). B) shows time (day) to be hospitalized to receive  
316 medical interventions from disease onset.

317

318 **Figure 2.**

319 Multivariate analysis for the efficacy of ronapreve using variables of age, BMI, and high-  
320 risk factors. Forest plots depict the comparison of the incidences between watchful  
321 observation and ronapreve groups.

322

323 **Figure 3.**

324 Multivariate analysis for age  $\geq 50$  years, 1, or 2, or 3 or more high-risk factors, BMI  $\geq 30$ ,

325 and  $SPO_2 \geq 96\%$  in ronapreve group. Forest plots depict the comparison of the incidences.

326

327 **Figure 4.**

328 Accumulation of patients with events from ronapreve administration (date of the

329 dripping indicates day 0).

330 Event indicates that fever is down.

l.

| Characteristics                          | Ronapreve (n= 55) | Watchful observation (n= 53) | p value |
|------------------------------------------|-------------------|------------------------------|---------|
| Median age (IQR), yr                     | 51.0 (20.0, 94.0) | 52.0 (20.0, 68.0)            | 0.939   |
| Male sex, no. (%)                        | 38 (69.1)         | 30 (56.6)                    | 0.232   |
| Median BMI (IQR)                         | 27.5 (17.2, 47.5) | 23.5 (14.7, 38.6)            | 0.011   |
| Patients with high-risk factors, no. (%) |                   |                              | < 0.00  |
| 1 factor                                 | 17 (30.9)         | 41 (77.4)                    |         |
| 2 factors                                | 18 (32.7)         | 6 (11.3)                     |         |
| 3 or more factors                        | 20 (36.4)         | 6 (11.3)                     |         |
| PO <sub>2</sub> , no. (%)                |                   |                              | 0.169   |
| ≥96%                                     | 37 (67.3)         | 28 (52.8)                    |         |
| ≤95%                                     | 18 (32.7)         | 25 (47.2)                    |         |
| Pneumonia, no. (%)                       |                   |                              |         |
| yes                                      | 24 (43.6)         | N.E                          |         |
| no                                       | 31 (56.4)         | N.E                          |         |

1.

### A) Ronapreve Group

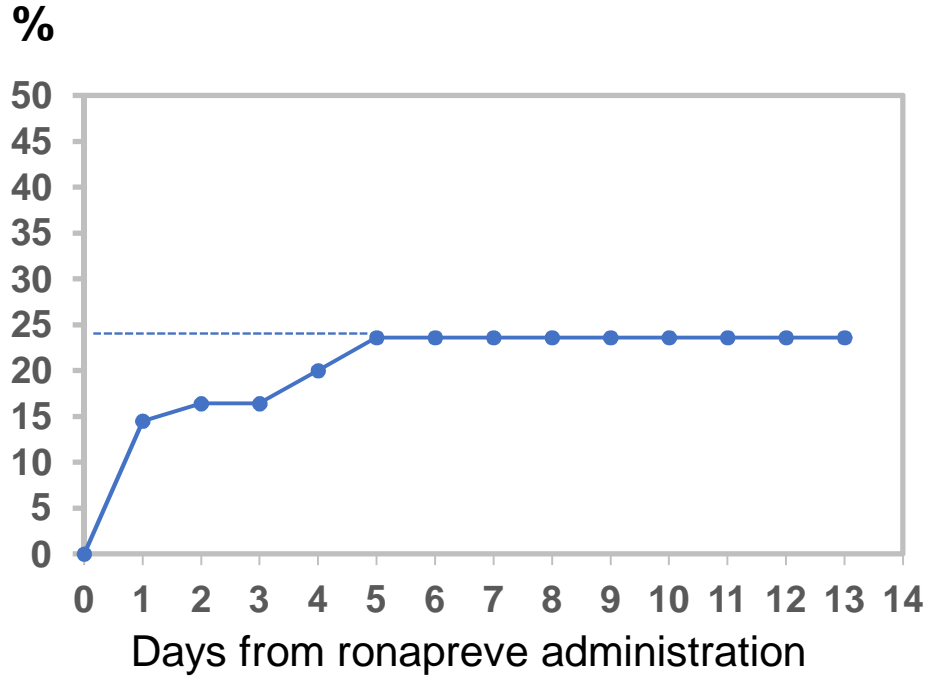

n: 55 47 46 46 44 42 42 42 42 42 42 42 42

### B) Watchful observation Group

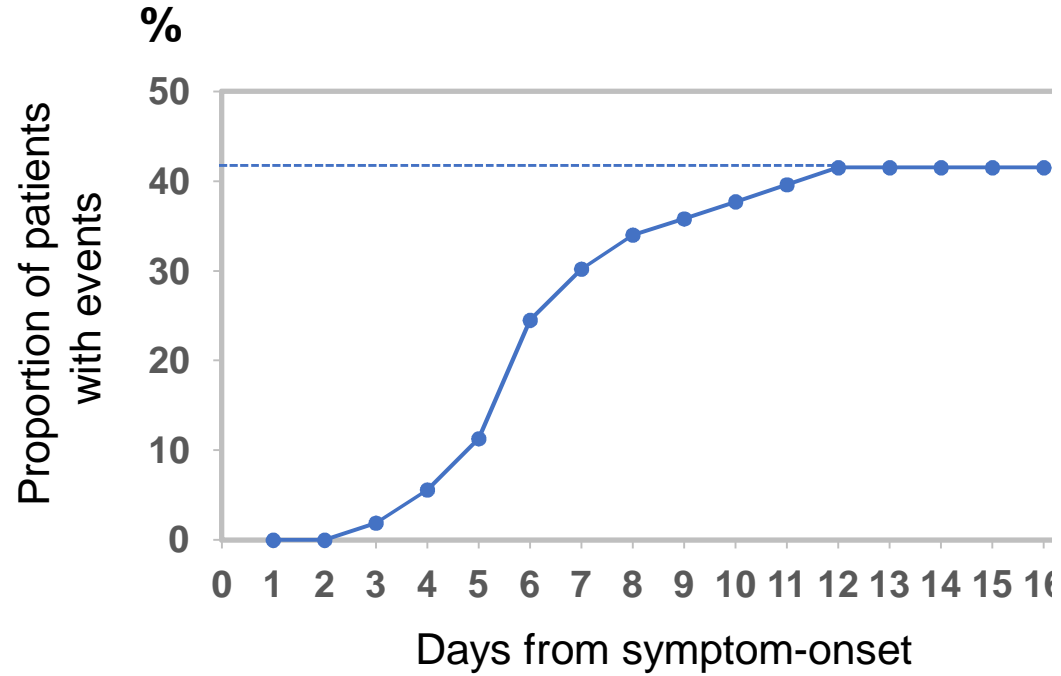

n: 53 53 53 52 50 49 40 37 35 34 33 32 31 31 31 31 3



2.

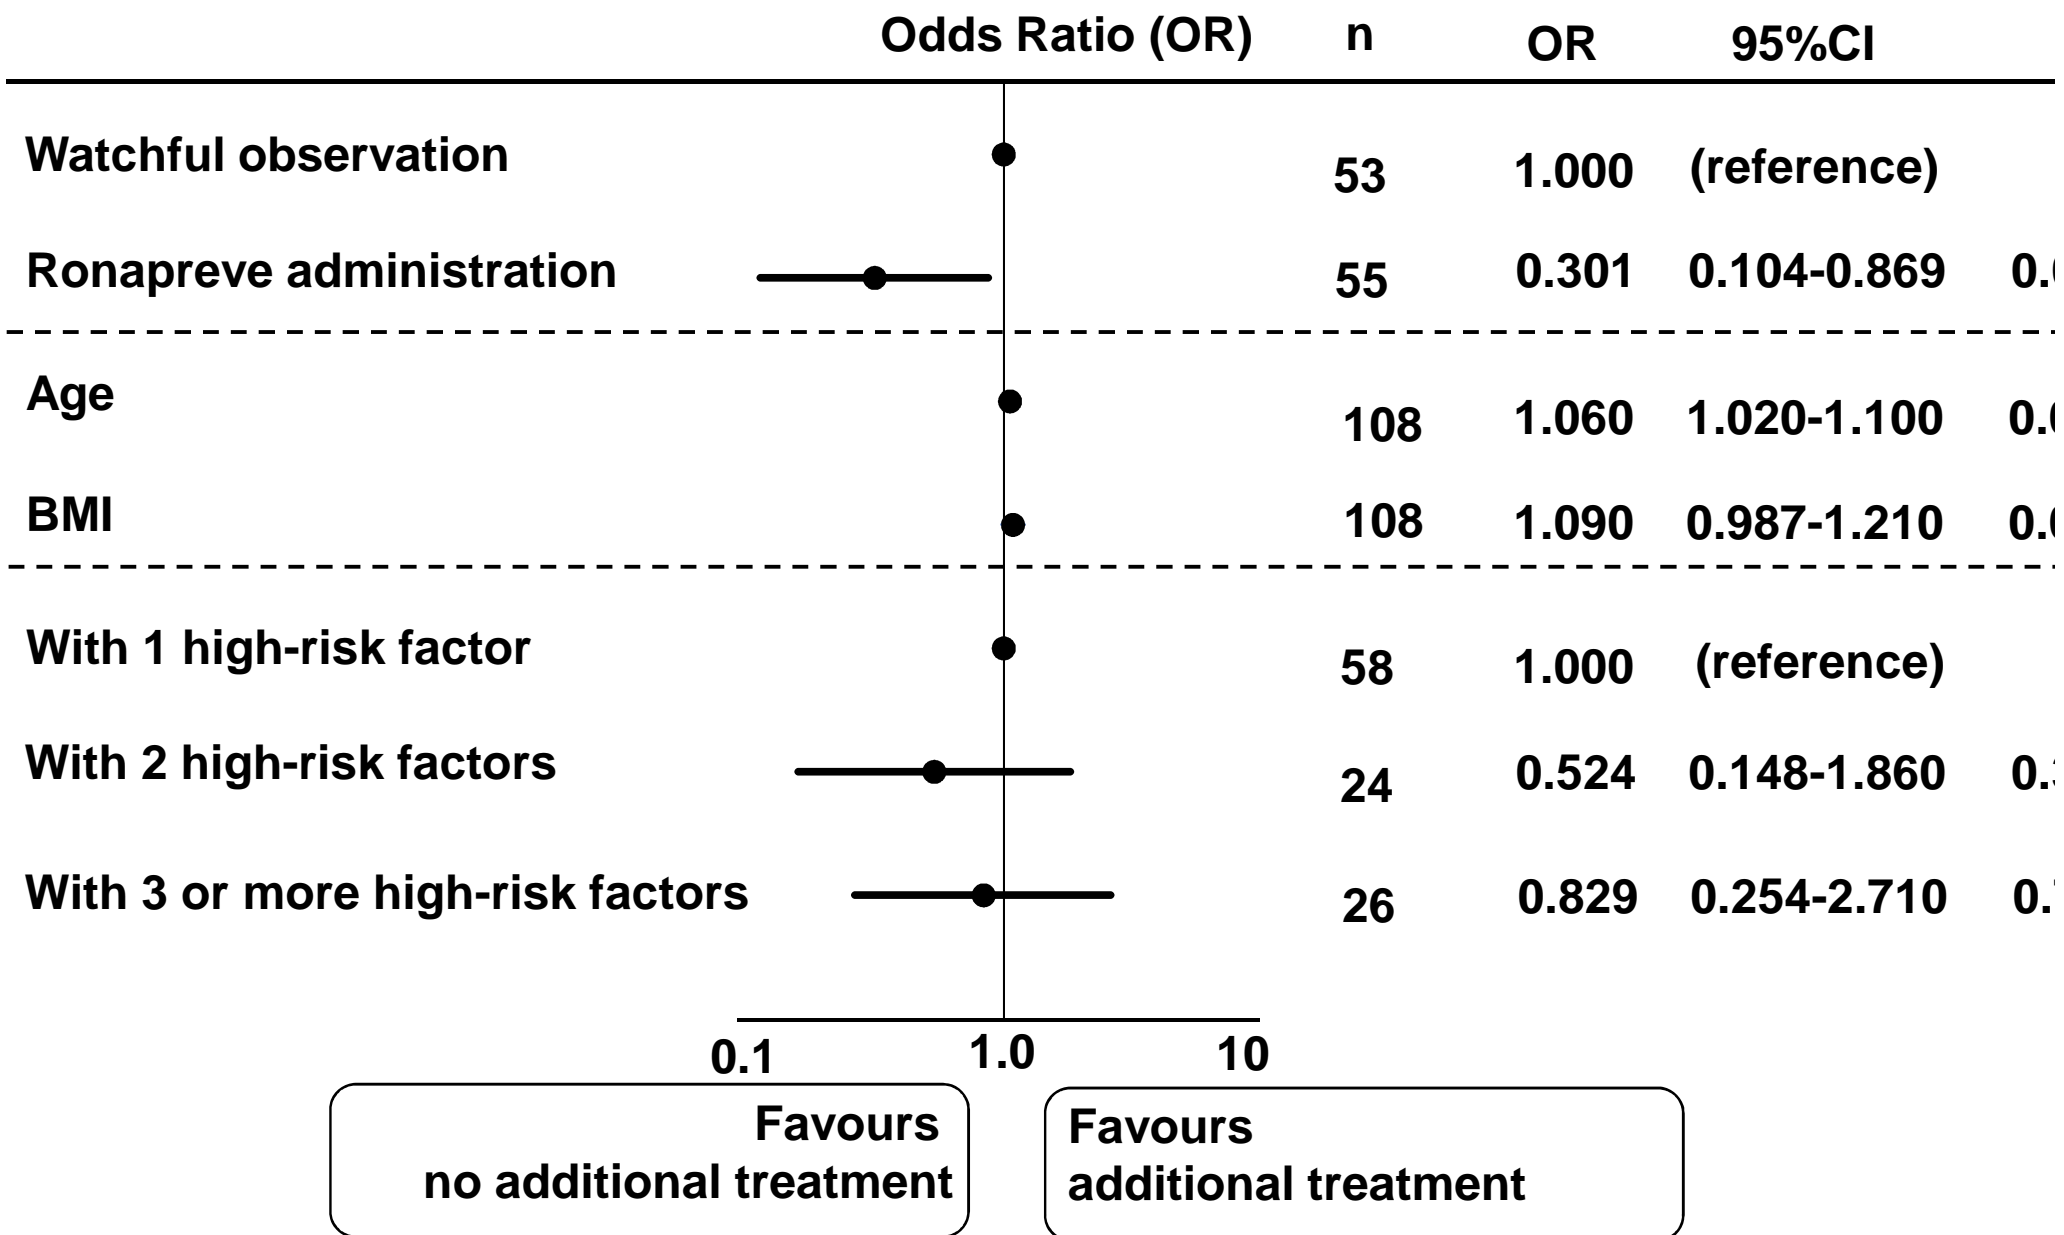

3.

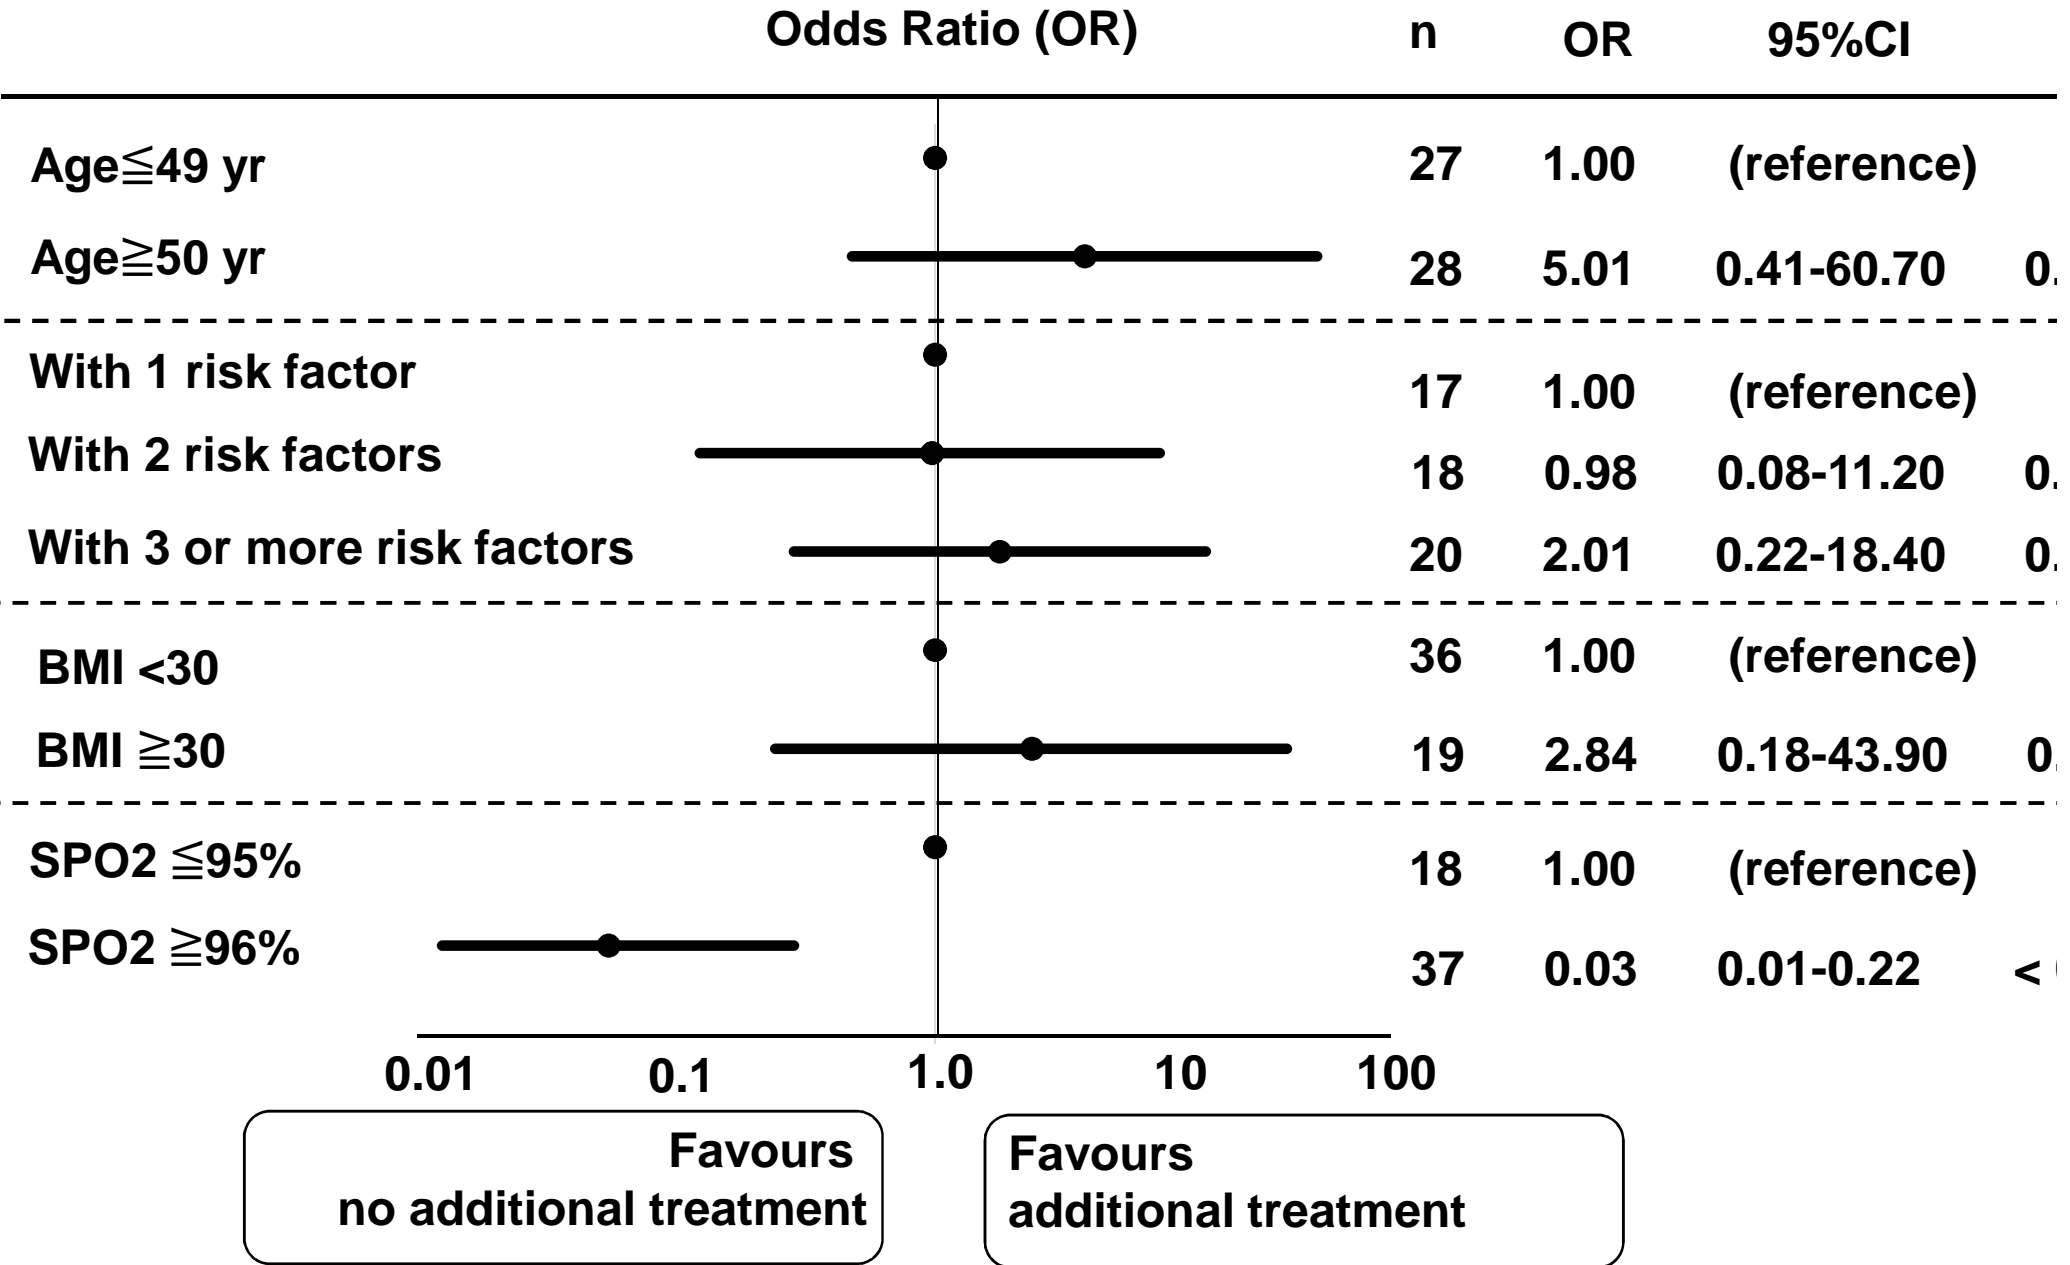

Figure 4.

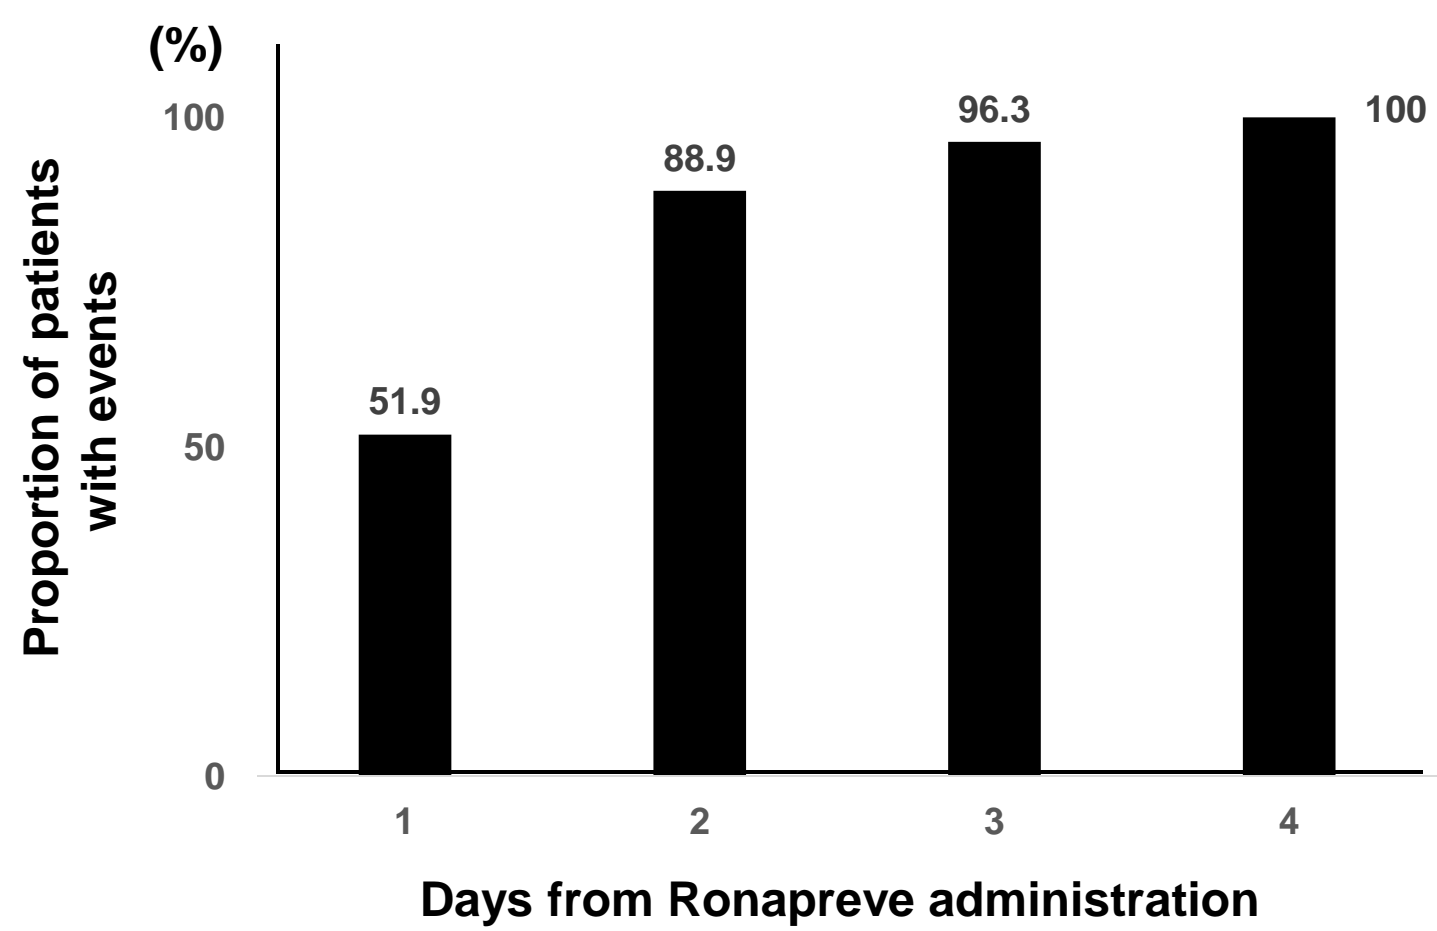

Imputed no.(total 27) : 14

24

26

27
